# Supplementary material for: Lowlands fluvial sedimentation enlightens glacial dynamics in narrow valleys during the Last Glacial Maximum (Venetian Forealps, Italy)
Source: Copernicus journal article supplement (doi:10.5194/esurf-2018-22), 2018-05-14
Supplement: Supplementary file 1 [file esurf-2018-22-supplement.zip]

# Lowlands fluvial sedimentation enlightens glacial dynamics in narrow valleys during the Last Glacial Maximum (Venetian Forealps, Italy)

Sandro Rossato<sup>1</sup>, Anna Carraro<sup>2</sup>, Giovanni Monegato<sup>2</sup>, Paolo Mozzi<sup>1</sup>, Fabio Tateo<sup>2</sup>

5 <sup>1</sup>Department of Geosciences, University of Padova, 35131, Italy

<sup>2</sup>Institute of Geosciences and Earth Resources (IGG) – National Research Council (CNR), Padova, 35131, Italy

*Correspondence to:* Sandro Rossato (sandro.rossato@unipd.it)

## Supplementary material - captions

10 SFigure 1: Mineralogical and geochemical parameters (Feldspars/Quartz and  $\text{Al}_2\text{O}_3/\text{CaO}$  ratio, respectively) useful to highlight peculiar compositional features of Units 1, 2 and 3 from cores RB1 and PM1 (bulk sediments).

SFigure 2: Ternary diagram reporting main selected geochemical components of bulk sediments in RB1 and PM1 cores.

15 STable 1: Results of mineralogical and geochemical analyses of RB1 and PM1 cores.
