# Supplementary figures and images for: Lowlands fluvial sedimentation enlightens glacial dynamics in narrow valleys during the Last Glacial Maximum (Venetian Forealps, Italy)
Source: Copernicus journal article supplement (doi:10.5194/esurf-2018-22), 2018-05-14

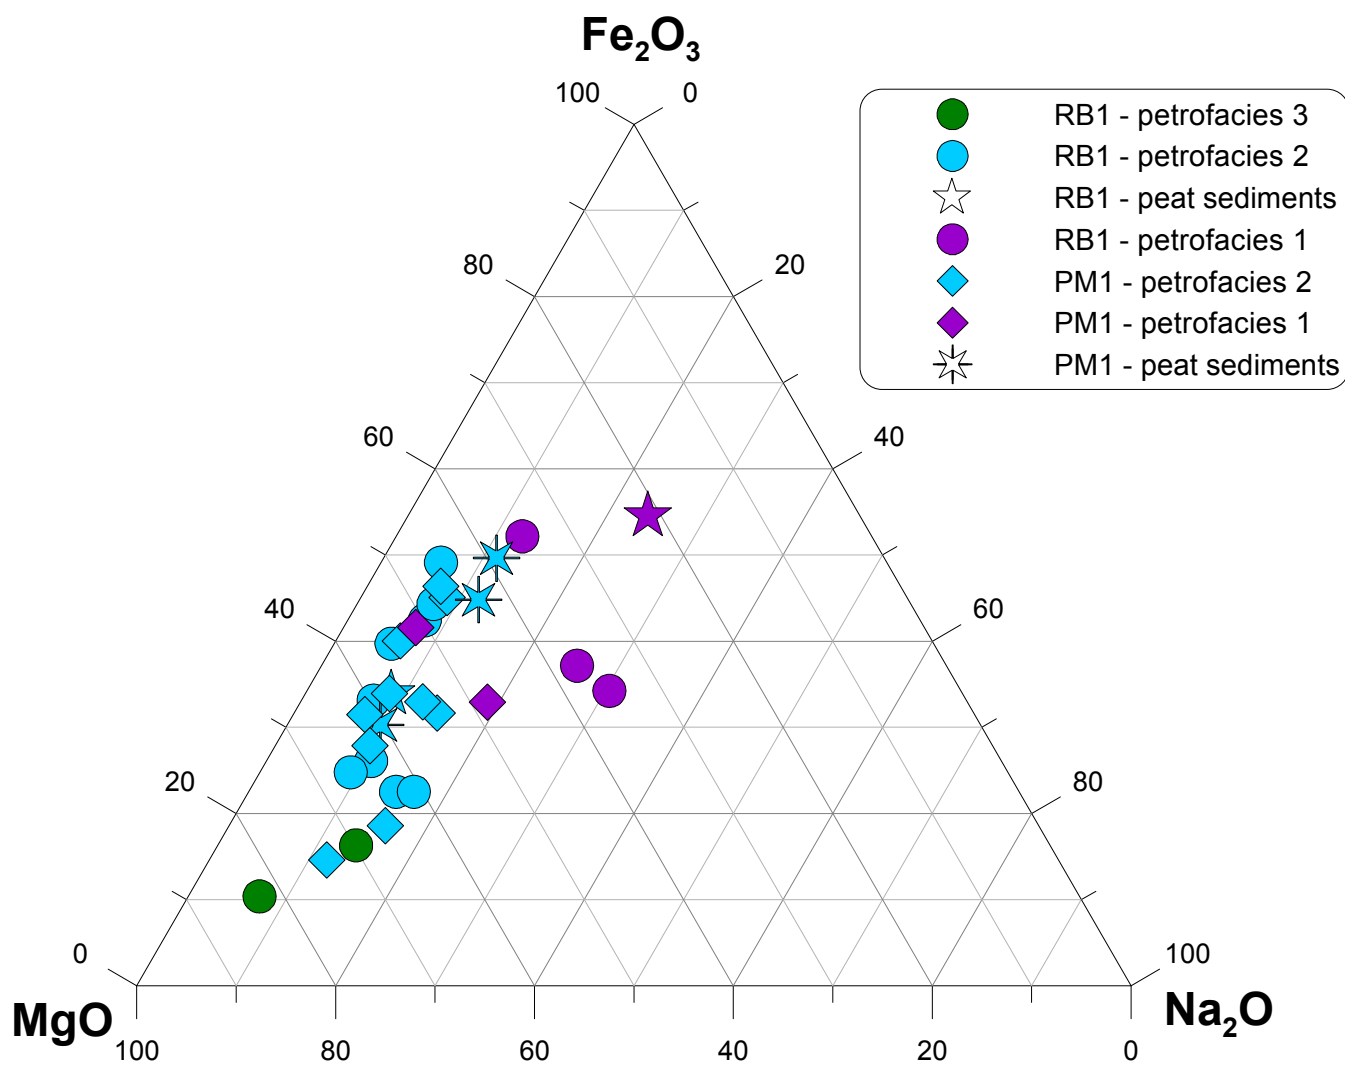

Supplement: Supplementary file 2 [file esurf-2018-22-supplement.zip]
